# Supplementary material for: 20S-Protopanaxatriol improves cognitive function of Alzheimer's disease by promoting endogenous neurogenesis
Source: Royal Society of Chemistry journal article supplement (doi:10.1039/d2fo03191d), 2023-01-01
Supplement: d2fo03191d1.pdf [file d2fo03191d1.pdf]

### Supporting Information

Supporting information Table S1. Primers of target genes used in this study

| Species   | Target gene         | Sequence of primer                |
|-----------|---------------------|-----------------------------------|
| zebrafish | <i>gapdh</i>        | F 5'- ACCACAGTCCATCAC-3'          |
|           |                     | R 5'- TCCACCACCCTGTTGCTGTA-3'     |
| zebrafish | <i>huc</i>          | F 5'- AGACAAGATCACAGGCCAGAGCTT-3' |
|           |                     | R 5'- TGGTCTGCAGTTTGAGACCGTTGA-3' |
| zebrafish | <i>neurod1</i>      | F 5'-ATGCCTCCAACCTGAACCC-3'       |
|           |                     | R 5'-AGACCCGCTGCCTGATAG-3'        |
| mouse     | <i>18s</i>          | F 5'-AGTCCCTGCCCTTTGTACACA-3'     |
|           |                     | R 5'-CGATCCGAGGGCCTCACTA-3'       |
| mouse     | <i>gfap</i>         | F 5'- TCTCGAATGACTCCTCCACTC-3',   |
|           |                     | R 5'-AAGCTCCGCCTGGTAGACAT-3'      |
| mouse     | <i>dcx</i>          | F 5'-GGCCAAGAAGGTACGTTTCTAC-3'    |
|           |                     | R5'-AGCAACGCATCAAACTACGAA-3'      |
| mouse     | $\beta$ III tubulin | F 5'-GCGCCTTTGGACACCTATTCA-3'     |
|           |                     | R 5'-GCCCTCCGTATAGTGCCCT -3'      |
| human     | <i>app</i>          | F 5'-CAAGCAGTGCAAGACCCATC-3'      |
|           |                     | R 5'-AGAAGGGCATCACTTACAACTC-3'    |

Supporting information Table S2. Interaction energies after computational alanine scanning of the

residues

|            | <b>Residue</b> | <b>Interaction Energy (kcal/mol)</b> | <b>VDW Interaction Energy (kcal/mol)</b> | <b>Electrostatic Interaction Energy (kcal/mol)</b> |
|------------|----------------|--------------------------------------|------------------------------------------|----------------------------------------------------|
| 2RD0-E821A | A_LYS271       | -1.524960                            | -4.654240                                | 3.129280                                           |
|            | A_ARG818       | -22.157976                           | -5.524761                                | -16.633215                                         |
|            | A_PRO835       | -4.269438                            | -2.354823                                | -1.914615                                          |
| 2RD0-K271A | A_ARG818       | -22.157976                           | -5.524761                                | -16.633215                                         |
|            | A_GLU821       | -8.876178                            | -1.881095                                | -6.995083                                          |
|            | A_PRO835       | -4.269438                            | -2.354823                                | -1.914615                                          |
| 2RD0P835A  | A_LYS271       | -1.524960                            | -4.654240                                | 3.129280                                           |
|            | A_ARG818       | -22.157976                           | -5.524761                                | -16.633215                                         |
|            | A_GLU821       | -8.876178                            | -1.881095                                | -6.995083                                          |
| 2RD0-R818A | A_LYS271       | -1.524960                            | -4.654240                                | 3.129280                                           |
|            | A_GLU821       | -8.876178                            | -1.881095                                | -6.995083                                          |
|            | A_PRO835       | -4.269438                            | -2.354823                                | -1.914615                                          |

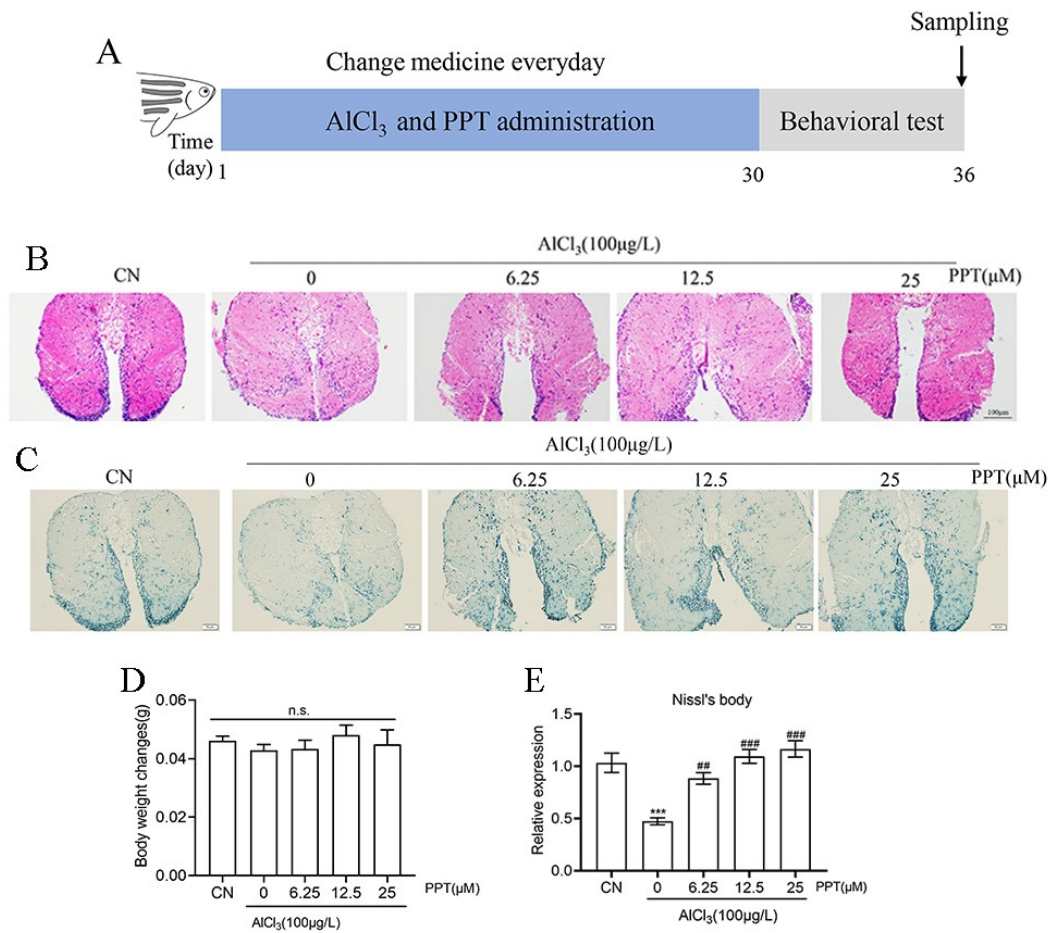

Supporting information Fig. S1. PPT improves cognitive function and neurogenesis in AD zebrafish. (A) Flowchart of the zebrafish experiment. (B) HE staining results. (C) Nissl's staining results.

(D) Changes in body weight of zebrafish before and after drug administration. (E) Quantitative results of Nissl bodies. Nissl's staining results presented as *mean*  $\pm$  *SD* ( $n=3$ ; compared with the control group, \*\*\* $P < 0.001$ ; compared with the model group, ## $P < 0.01$ , ###  $P < 0.001$ ).

A

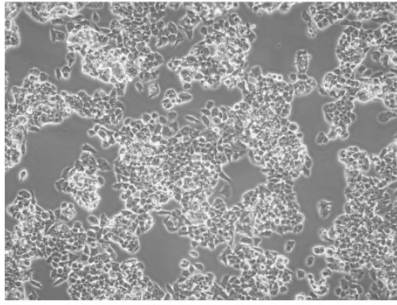

B

|            | <i>18s</i> CT | <i>app</i> CT |
|------------|---------------|---------------|
| N2a        | 18.548        | Undetermined  |
|            | 17.812        | Undetermined  |
|            | 19.360        | Undetermined  |
|            | 18.559        | Undetermined  |
| N2a/APPswe | 20.722        | 25.100        |
|            | 20.734        | 25.281        |
|            | 20.714        | 24.023        |
|            | 20.778        | 25.683        |

C

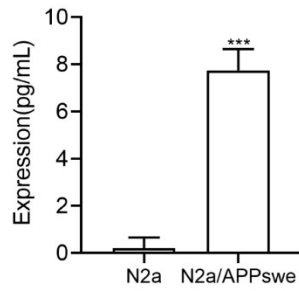

Supporting information Fig. S2. The verification of N2a/APPswe cell line. (A) Cellular morphology photograph of N2a/APPswe cell line. (B) CT value of *app* between N2a and N2a/APPswe cell line. (C) A $\beta$  secretion of N2a/APPswe cell in conditioned medium.

A

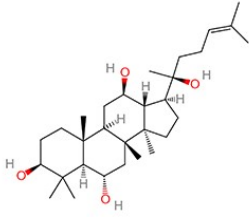

B

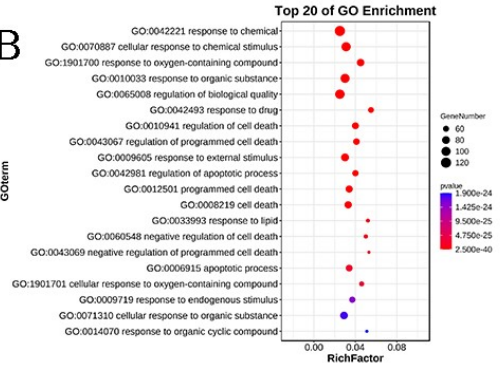

C

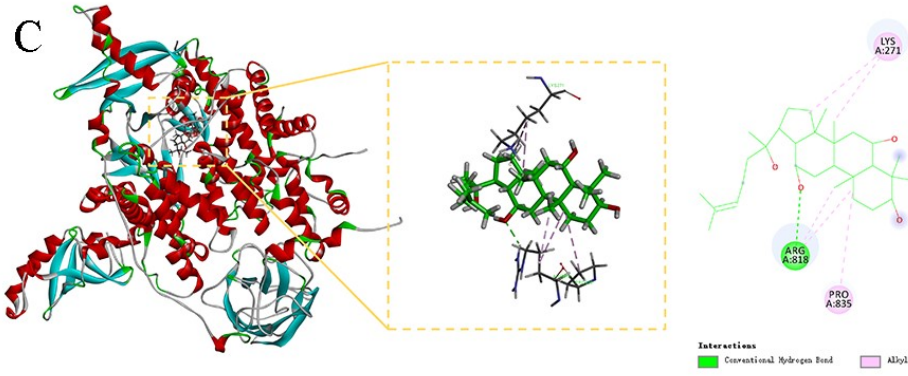

D

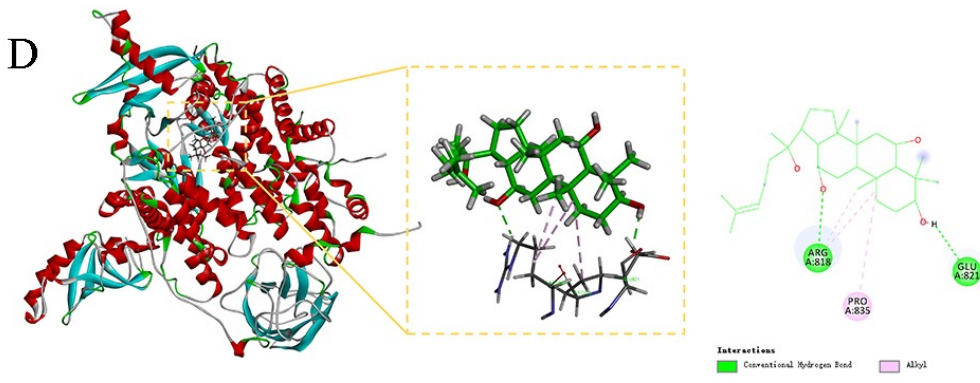

E

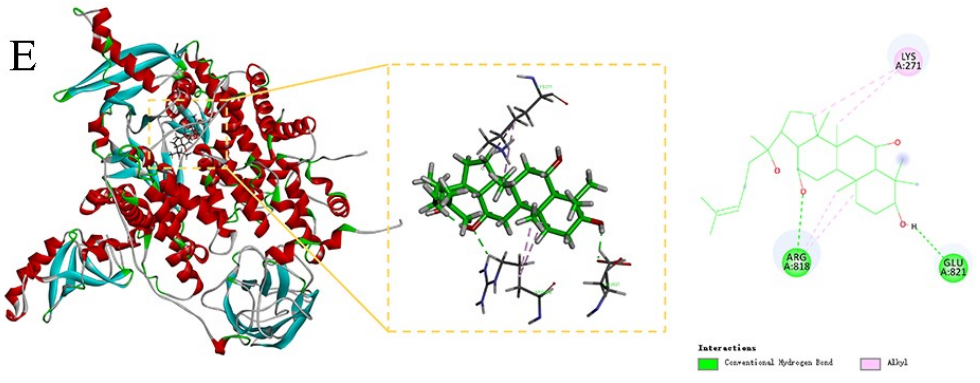

F

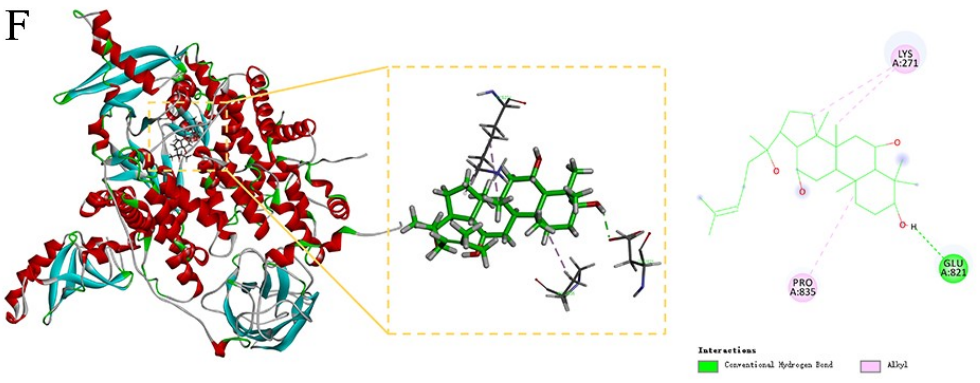

Supporting information Fig. S3. Signaling pathways of PPT in treating AD predicted by network pharmacology and site-directed mutagenesis analysis of PI3CA1 and PPT. (A) The chemical structure of PPT is shown. (B) Distribution of potential targets in GO enrichment analysis. Top 20 pathways with corresponding p-values, displayed in a dot plot. The color indicated p-values and the sizes of the dots represented the gene count of each term. (C) 2RD0-E821A. (D) 2RD0-K271A. (E) 2RD0-P835A. (F) 2RD0-R818A.
